# Supplementary material
Source: publisher site journal article supplement (https://www.dovepress.com/article/442507)
Supplement: Supplementary file 1 [file get_supplementary_file.php]

**Supplementary files.**

**Table S1: CASP checklist**

**Paper for appraisal and reference:**

| Section A: Are the results of the review valid? | | | | |
| --- | --- | --- | --- | --- |
|  | | | | |
| 1. Did the review address a clearly focused question? | Yes |  | |  |
| Can’t Tell |  | |
| No |  | |
| Comments: | | | | |
| 1. Did the authors look for the right type of papers? | Yes |  | |  |
| Can’t Tell |  | |
| No |  | |
| Comments: | | | | |
| Is it worth continuing? | | | | |
| 1. Do you think all the important, relevant studies were included? | Yes |  | |  |
| Can’t Tell |  | |
| No |  | |
| Comments: | | | | |
| 4. Did the review’s authors do enough to assess quality of the included studies? | Yes | |  |  |
| Can’t Tell | |  |
| No | |  |
| Comments: | | | | |
| 5. If the results of the review have been combined, was it reasonable to do so? | Yes | |  |  |
| Can’t Tell | |  |
| No | |  |
| Comments: | | | | |
| Section B: What are the results? | | | | |
| 6. What are the overall results of the review? | | | |  |
| Comments: | | | | |
| 7. How precise are the results? | | | |  |
| Comments: | | | | |
| Section C: Will the results help locally? | | | | |
| 8. Can the results be applied to the local population? | Yes | |  |  |
| Can’t Tell | |  |
| No | |  |
| Comments: | | | | |
| 9. Were all important outcomes considered? | Yes | |  |  |
| Can’t Tell | |  |
| No | |  |
| Comments: | | | | |
| 10. Are the benefits worth the harms and costs? | Yes | |  |  |
| Can’t Tell | |  |
| No | |  |
| Comments: | | | | |

**Note**: Critical Appraisal Skills Programme (2018). CASP (Systematic Review) Checklist. Available at: https://casp-uk.net/casp-tools-checklists/. Accessed: March 26, 2024. ©CASP this work is licensed under the Creative Commons Attribution – Non-Commercial-Share A like. To view a copy of this license, visit <http://creativecommons.org/licenses/by-nc-sa/3.0/> [www.casp-uk.net](http://www.casp-uk.net/)

Table S2: showing the CASP criterion

| 1st author (year of study) | CASP criteriona | | | | | | | | | | |
| --- | --- | --- | --- | --- | --- | --- | --- | --- | --- | --- | --- |
| 1 | 2 | 3 | 4 | 5 | 6 | 7 | 8 | 9 | 10 | Total scoreb |
| Akpalu, A et al., (2022) (25) | 2 | 2 | 2 | 2 | 2 | 1 | 2 | 2 | 2 | 2 | 19 |
| Dabilgou, A et al., (2021) (24) | 2 | 2 | 2 | 2 | 2 | 1 | 2 | 2 | 2 | 2 | 19 |
| Walker, R et al., (2013) (26) | 2 | 2 | 2 | 2 | 2 | 2 | 2 | 2 | 2 | 2 | 20 |
| Mbonda, P et al., (2021) (29) | 2 | 2 | 2 | 2 | 2 | 1 | 2 | 2 | 2 | 2 | 19 |
| Kamgang, J et al., (2021) (27) | 2 | 2 | 2 | 2 | 2 | 1 | 2 | 2 | 2 | 2 | 19 |
| Lekoubou, A et al., (2017) (28) | 2 | 2 | 2 | 2 | 2 | 2 | 2 | 2 | 2 | 2 | 20 |
|  |  |  |  |  |  |  |  |  |  |  |  |

aCASP criterion: 1. Was there a clear statement of the aims of the research? 2. Is a qualitative methodology appropriate? 3. Was the research design appropriate to address the aims of the research? 4. Was the recruitment strategy appropriate to the aims of the research? 5. Was the data collected in a way that addressed the research issue? 6. Has the relationship between researcher and participants been adequately considered? 7. Have ethical issues been taken into consideration? 8. Was the data analysis sufficiently rigorous? 9. Is there a clear statement of findings? 10. How valuable is the research?

bCASP critical score: a) Criterion is completely met = 2; b) criterion is partially met = 1; c) criterion not applicable, not met, or not mentioned = 0; Total score 20 = high quality; 16–19 moderate quality; ≤ 15 low quality
